# Supplementary material for: The Role of Non-animal Origin Feed Ingredients in Transmission of Viral Pathogens of Swine: A Review of Scientific Literature
Source: PubMed Central journal article supplement (PMC6714588; doi:10.3389/fvets.2019.00273), 2019-08-22
Supplement: Data_Sheet_3.pdf [file Data_Sheet_3.pdf]

## Data Extraction Form for Non-animal Origin Feed Ingredient (NOFI) Literature Review

### General Information

1. Reviewer(s):
2. Date of data extraction:
3. Author(s):
4. Article Title:
5. Type of publication:  
No Selection      Journal article      Government publication  
Conference abstract      Other (specify)
6. Publication name/year:
7. Country of origin:
8. Source of funding/author affiliation:

### Study Characteristics

1. Study objectives:
2. Study design:
3. Study inclusion and exclusion criteria:
4. Unit of allocation:
5. Study description (brief)

## **Outcome data/results**

1. Unit of assessment/analysis
2. Statistical techniques used:
3. Results of study:

## **Quality Assessment**

1. Appropriateness of study design to the research objective:
2. Sources of potential bias:
3. Statistical/analysis issues:
4. Quality of reporting:
5. Generalizability:
6. Overall quality:  
No selection      High      Medium      Low
7. Comments:
